# Supplementary material
Source: MDPI journal article supplement (https://www.mdpi.com/2075-163X/11/12/1353)
Supplement: s1 [file s1]

Article

# Diagenesis and the conditions of deposition of the Middle Jurassic siderite rocks from the northern margin of the Holy Cross Mountains (Poland)

Aleksandra Kozłowska <sup>1,\*</sup>, Anna Feldman-Olszewska <sup>1</sup>, Marta Kuberska <sup>1</sup> and Anna Maliszewska <sup>2</sup>

<sup>1</sup> Polish Geological Institute-National Research Institute, Rakowiecka 4, 00-975 Warsaw, Poland; anna.feldman-olszewska@pgi.gov.pl (A.F-O); marta.kuberska@pgi.gov.pl (M.K.);

<sup>2</sup> retired employee of Polish Geological Institute-National Research Institute (A.M.)

\* Correspondence: aleksandra.kozlowska@pgi.gov.pl (A.K.)

## Supplementary Materials

Table S1. Composition of clayey siderites (vol. %)\*

| Borehole       | Depth (m)   | Age     | Siderite | Clay minerals | Quartz | Feldspars | Micas | Pyrite | Organic matter | Intraclast | Bioclasts | Ooids | Other        |
|----------------|-------------|---------|----------|---------------|--------|-----------|-------|--------|----------------|------------|-----------|-------|--------------|
| Gutwin         | 147.7       | Bt1     | 73.0     | 10.0          | 15.0   | 0.0       | 0.0   | 2.0    | 0.0            | tr         | 0.0       | 0.0   | 0.0          |
|                | 162.3       | Bt1     | 62.0     | 2.0           | 33.7   | 0.7       | 0.0   | 0.0    | 0.3            | 1.0        | 0.3       | 0.0   | 0.0          |
|                | 164.15      | Bt1     | 75.0     | 15.0          | 10.0   | 0.0       | 0.0   | 0.0    | 0.0            | 0.0        | 0.0       | 0.0   | 0.0          |
|                | 176.3       | Bj2     | 69.0     | 8.0           | 20.0   | 0.0       | 1.0   | 0.0    | 1.0            | 0.0        | 0.0       | 0.0   | 1.0Hm        |
|                | 191.1       | Bj2     | 69.0     | 8.0           | 20.0   | tr        | 0.0   | 0.0    | tr             | 0.0        | 1.0       | 2.0   | 0.0          |
|                | 220.6       | Bj2     | 77.0     | 15.0          | 5.0    | 0.0       | 0.0   | 2.0    | 1.0            | 0.0        | 0.0       | 0.0   | 0.0          |
|                | 232.7-233.0 | Bj2     | 75.0     | 20.0          | 5.0    | 0.0       | 0.0   | 0.0    | 0.0            | 0.0        | tr        | 0.0   | 0.0          |
|                | 290.1       | Aa1     | 52.0     | 15.0          | 30.0   | 0.0       | 1.0   | tr     | 2.0            | 0.0        | 0.0       | 0.0   | 0.0          |
| Justynów PIG 1 | 17.0        | Bj2 (?) | 55.0     | 30.0          | 5.0    | tr        | 0.0   | 0.0    | 0.0            | 0.0        | 0.0       | 0.0   | 10.0Ph       |
|                | 18.5        | Bj2 (?) | 60.0     | 10.0          | 25.0   | 0.0       | 3.0   | tr     | 2.0            | 0.0        | 0.0       | 0.0   | 0.0          |
|                | 19.8        | Bj2 (?) | 75.0     | 20.0          | 3.0    | 0.0       | 1.0   | tr     | 1.0            | 0.0        | 0.0       | 0.0   | 0.0          |
|                | 20.3        | Bj2 (?) | 64.0     | 10.0          | 25.0   | 0.0       | 1.0   | 0.0    | 0.0            | 0.0        | 0.0       | 1.0   | 0.0          |
|                | 25.5        | Bj2 (?) | 55.0     | 5.0           | 32.0   | tr        | 1.0   | tr     | 2.0            | 0.0        | 0.0       | 0.0   | 0.0          |
| Mniszków IG 1  | 958.0       | Bt1     | 67.7     | 8.7           | 11.7   | 0.3       | 0.7   | 0.3    | 0.3            | 0.0        | tr        | 1.0   | 9.3Ank       |
|                | 958.4       | Bt1     | 89.0     | 3.0           | 5.0    | tr        | 0.0   | 0.0    | 1.0            | 0.0        | tr        | 0.0   | 2.0Ank       |
|                | 959.5       | Bt1     | 62.3     | 5.7           | 29.7   | tr        | 0.0   | tr     | 0.6            | 1.0        | 0.0       | 0.7   | 0.0          |
|                | 961.0       | Bt 1    | 68.0     | 7.3           | 16.0   | 0.0       | 0.7   | tr     | 1.0            | 0.0        | 0.3       | 1.0   | 5.7Ank trZrn |
| Mołdawa        | 146.5       | Bt1-2   | 90.0     | 3.0           | 5.0    | 0.0       | tr    | 1.0    | 1.0            | 0.0        | tr        | 0.0   | 0.0          |
|                | 244.1       | Bt1-2   | 63.0     | 0.0           | 33.0   | 2.3       | 0.3   | 0.0    | 0.0            | 0.0        | 0.0       | 0.0   | 1.4Gth L     |
|                | 274.1       | Bj2?    | 70.7     | 5.3           | 15.3   | 0.0       | 0.3   | 0.8    | 1.0            | 0.0        | 1.3       | 3.0   | 2.3Cal       |
|                | 304.5       | Bj2     | 71.3     | 2.0           | 20.7   | 3.0       | 0.0   | 0.0    | 1.3            | 0.0        | 1.0       | 0.0   | 0.7L         |
|                | 313.4       | Bj2     | 45.7     | 8.0           | 35.0   | 1.3       | 0.3   | 0.0    | 2.3            | 0.0        | 1.7       | 5.4   | 0.3Cal       |
|                | 384.7       | Bj2     | 85.0     | 0.0           | 8.0    | 0.0       | 0.0   | 1.0    | 1.0            | 0.0        | 0.0       | 0.0   | 5.0Ank       |
|                | 388.0       | Bj2     | 80.0     | 5.0           | 5.0    | 0.0       | tr    | 0.0    | 1.0            | 0.0        | 0.0       | 0.0   | 9.0Cal       |
|                | 401.3       | Bj2     | 52.7     | 7.0           | 35.6   | 0.7       | 0.0   | 1.7    | 2.0            | 0.0        | 0.0       | 0.3   | 0.0          |
|                | 451.5       | Aa1     | 71.0     | 4.7           | 17.0   | 1.0       | 0.0   | 2.3    | 4.0            | 0.0        | 0.0       | 0.0   | 0.0          |
| Omięcin XI/2   | 36.0        | Bj2     | 71.7     | 12.3          | 13.3   | 0.0       | 1.7   | 0.0    | 0.0            | 0.0        | 1.0       | tr    | 0.0          |
|                | 67.7-68.2   | Bj2     | 51.0     | 1.0           | 43.3   | 0.3       | 0.0   | 0.0    | 0.0            | 0.0        | 2.7       | 1.7   | 0.0          |

|                       |             |           |      |           |      |     |     |     |     |     |      |      |              |
|-----------------------|-------------|-----------|------|-----------|------|-----|-----|-----|-----|-----|------|------|--------------|
|                       | 116.0-116.2 | Aa1(?)    | 59.0 | 3.7       | 30.3 | 0.0 | 0.0 | 0.0 | 0.3 | tr  | 6.0  | 0.7  | 0.0          |
| Omięcin XI/3          | 132.2       | Bj2       | 63.0 | 4.3 cl-fe | 30.0 | 0.3 | 0.0 | 0.0 | 0.0 | 0.0 | 0.7  | 1.7  | 0.0          |
|                       | 144.5       | Bj2       | 54.7 | 10.3      | 26.0 | 0.0 | 0.0 | 0.0 | 0.0 | 0.0 | 0.0  | 0.0  | 9.0Ank       |
|                       | 166.9       | Bj2       | 82.0 | 10.0      | 5.0  | 0.0 | 3.0 | 0.0 | tr  | 0.0 | 0.0  | 0.0  | 0.0          |
|                       | 184.4       | Bj2       | 58.0 | 0.0       | 17.0 | 0.0 | 0.0 | 0.0 | 0.0 | 0.0 | 10.3 | tr   | 14.7Ank      |
|                       | 200.0       | Bj2       | 52.7 | 11.7      | 35.0 | 0.3 | 0.3 | 0.0 | 0.0 | 0.0 | 0.0  | 0.0  | 0.0          |
|                       | 204.2       | Bj1(?)    | 58.3 | 0.4       | 31.7 | 0.0 | 0.3 | 0.0 | 0.3 | 0.0 | 2.3  | 0.0  | 6.7Ank       |
|                       | 225.0       | Aa1(?)    | 50.0 | 0.4       | 43.7 | 0.3 | 0.0 | 0.0 | 0.0 | 1.0 | 0.3  | 4.3  | 0.0          |
|                       | 234.0       | Aa1-J1(?) | 64.4 | 2.3       | 31.3 | 0.3 | 0.0 | 0.0 | 0.7 | 0.0 | 0.0  | 1.0  | tr Zn        |
| Wagłany k/<br>Opoczna | 312.5       | Bt1-2     | 50.3 | 0.3       | 27.7 | 0.7 | 0.3 | 0.0 | 0.3 | 0.0 | 5.0  | 0.0  | 14.Ank 0.7Hm |
|                       | 314.5       | Bt1-2     | 83.0 | 10.0      | 5.0  | tr  | 0.0 | 0.0 | 0.0 | 0.0 | tr   | 0.0  | 2.0Ank       |
|                       | 361.2       | Bt1-2     | 90.0 | 5.0       | 5.0  | 0.0 | tr  | 0.0 | 0.0 | 0.0 | 0.0  | 0.0  | 0.0          |
|                       | 395.2       | Bt1-2     | 57.7 | 3.3       | 12.0 | 0.0 | 0.0 | 0.0 | 1.7 | 1.7 | 7.3  | 18.0 | 0.0          |
|                       | 400.0       | Bt1-2     | 50.0 | 2.7       | 45.7 | 1.0 | 0.0 | 0.0 | 0.0 | 0.3 | 0.3  | 0.0  | 0.0          |
|                       | 406.0       | Bt1-2     | 59.7 | 4.0       | 34.3 | 0.3 | 0.7 | 0.0 | 1.0 | 0.0 | 0.0  | 0.0  | 0.0          |
|                       | 412.4       | Bt1-2     | 67.2 | 4.3       | 21.7 | 0.7 | 0.3 | 0.0 | 0.7 | 0.7 | 2.7  | 1.7  | 0.0          |
|                       | 419.2       | Bt1-2     | 60.0 | 9.4       | 25.3 | 1.0 | 1.3 | 0.0 | 2.4 | 0.3 | 0.0  | 0.0  | 0.3Kl        |
|                       | 424.6       | Bj2       | 54.4 | 8.0       | 34.3 | 1.0 | 0.3 | 0.0 | 0.7 | 1.0 | 0.3  | 0.0  | 0.0          |
|                       | 457.8       | Bj2       | 61.0 | 2.3       | 34.7 | 0.0 | 0.3 | 0.0 | 1.7 | 0.0 | 0.0  | 0.0  | tr Kao       |
|                       | 465.5       | Bj2       | 68.6 | 2.0       | 25.7 | 0.0 | 1.7 | 0.0 | 2.0 | 0.0 | 0.0  | 0.0  | 0.0          |
|                       | 501.6       | Bj2       | 80.0 | 10.0      | 8.0  | tr  | 2.0 | tr  | 0.0 | 0.0 | tr   | 0.0  | tr Ank       |
|                       | 512.3       | Bj2       | 63.6 | 7.0       | 22.7 | 0.0 | 1.0 | 0.0 | 0.0 | 0.7 | 0.0  | 1.0  | 4.0Ank       |
|                       | 588.0       | Aa2       | 50.0 | 30.0      | 2.0  | 0.0 | 0.0 | tr  | 3.0 | 0.0 | 10   | 0.0  | 5.0Ank       |
|                       | 597.2       | Aa1       | 67.4 | 8.4       | 11.3 | tr  | 0.3 | 0.0 | 2.7 | 0.3 | 0.3  | 9.3  | 0.0          |
| Władysław             | 184.4       | Bt1-2     | 80.0 | 4.0       | 10.0 | 1.0 | tr  | 0.0 | 0.0 | 0.0 | 0.0  | 0.0  | 0.0          |
|                       | 242.7       | Bt1 -2    | 98   | 1.0       | 1.0  | 0.0 | 0.0 | 0.0 | tr  | 0.0 | 0.0  | 0.0  | 0.0          |
|                       | 264.02      | Bt1-2     | 75.3 | 4.3       | 18.0 | 0.7 | 0.0 | 0.0 | 0.0 | 0.0 | 0.7  | 0.0  | 1.0Fe-hy     |
|                       | 295.6       | Bt1-2     | 96   | 1.0       | 1.0  | 0.0 | 0.0 | tr  | 2.0 | 0.0 | 0.0  | 0.0  | 0.0          |
|                       | 296.6       | Bt1-2(?)  | 85   | 1.0       | 3.0  | 0.0 | 0.0 | 0.0 | 1.0 | 0.0 | 0.0  | 0.0  | 0.0          |
|                       | 309.9       | Bj2       | 50.0 | 4.3       | 28.7 | 0.0 | 0.0 | 0.7 | 4.6 | 0.0 | 0.0  | 0.0  | 11.7Cal      |
|                       | 395.8       | Aa2       | 76.7 | 11.0      | 10.0 | 0.3 | 0.0 | 1.0 | 1.0 | 0.0 | 0.0  | 0.0  | 0.0          |
|                       | 396.3       | Aa1       | 88   | 1.0       | 10.0 | 0.0 | tr  | 1.0 | tr  | 0.0 | 0.0  | 0.0  | 0.0          |
| Wyszmontów 1          | 61.65       | Bt1-2     | 92   | 5.0       | 2.0  | 0.0 | tr  | tr  | 1.0 | 0.0 | 0.0  | 0.0  | 0.0          |
|                       | 77.5-77.6   | Bt1-2     | 77.6 | 0.7       | 19.0 | 0.0 | 0.7 | 0.0 | 0.7 | 1.3 | 0.0  | 0.0  | 0.0          |
|                       | 77.9        | Bt1-2     | 77.0 | 2.0       | 19.0 | 0.0 | 0.7 | 0.0 | 0.3 | 1.0 | 0.0  | 0.0  | 0.0          |
|                       | 80.5        | Bt1-2     | 66.7 | 8.0       | 12.0 | 0.0 | 0.0 | 0.0 | 2.0 | 0.0 | 0.3  | 11.0 | 0.0          |

|                         |       |         |      |           |      |     |     |      |     |     |     |      |          |
|-------------------------|-------|---------|------|-----------|------|-----|-----|------|-----|-----|-----|------|----------|
|                         | 84.6  | Bt1-2   | 67.0 | 10.0      | 16.7 | 0.0 | 0.3 | 0.0  | 0.7 | 0.0 | 9.3 | tr   | 0.0      |
|                         | 92.8  | Bj2     | 88   | 2.0       | 3.0  | 0.0 | 2.0 | 0.0  | 3.0 | 0.0 | 2.0 | 0.0  | 0.0      |
|                         | 103.7 | Bj2     | 50.0 | 8.3       | 21.0 | 0.0 | 0.4 | 2.0  | 1.7 | 0.3 | 5.0 | 1.3  | 10.0Cal  |
|                         | 125.0 | Bj2     | 53.7 | 9.7       | 11.0 | 0.0 | 1.3 | 12.7 | 1.6 | 0.0 | 1.7 | 0.0  | 8.3Cal   |
|                         | 126.3 | Bj2     | 92.7 | 1.0       | 3.7  | 0.0 | 0.3 | 0.0  | 2.0 | 0.0 | 0.3 | 0.0  | 0.0      |
|                         | 129.3 | Bj2     | 66.7 | 6.0       | 18.0 | 0.0 | 0.0 | 0.0  | 0.6 | 0.0 | 2.7 | 1.0  | 5.0Cal   |
|                         | 135.1 | Bj2     | 50   | 40.0      | 8.0  | 0.0 | 1.0 | 0.0  | 1.0 | 0.0 | 0.0 | 0.0  | 0.0      |
| Wyszmontów<br>PIG 2     | 29.1  | Bj2 (?) | 50.0 | 13.3      | 32.0 | 0.7 | 1.3 | 0.0  | 2.7 | 0.0 | 0.0 | 0.0  | 0.0      |
|                         | 30.7  | Bj2 (?) | 69.0 | 12.3      | 10.7 | 0.0 | 1.7 | 0.0  | 6.3 | 0.0 | 0.0 | 0.0  | 0.0      |
|                         | 31.8  | Bj2 (?) | 79.0 | 13.4      | 7.3  | 0.0 | 0.0 | 0.3  | 0.0 | 0.0 | 0.0 | 0.0  | 0.0      |
|                         | 34.6  | Bj2 (?) | 50.3 | 3.0       | 1.3  | 0.0 | 0.0 | 1.0  | 0.0 | 0.0 | 5.7 | 28.7 | 10.0 Cal |
| Zalesie<br>Antoniowskie | 206.2 | Bj2     | 90   | 2.0       | 5.0  | 0.0 | tr  | 1.0  | 1.0 | 0.0 | 1.0 | 0.0  | 0.0      |
|                         | 278.5 | Aa2     | 49.0 | 7.7       | 17.3 | 0.7 | 0.0 | 0.7  | 0.0 | 0.0 | 0.0 | 24.3 | 0.3L     |
|                         | 279.3 | Aa2     | 58.3 | 8.3 cl-fe | 13.0 | 0.0 | 0.3 | 1.3  | 0.3 | 0.0 | 0.7 | 16.0 | 1.8Cal   |

\* the quantification of constituents was executed by counting 300 points in each of thin sections. Ank – ankerite, Cal - calcite, Fs – feldspar, Gth – goethite, Glt – glauconite, cl-fe – clay-ferruginous, Hm – hematite, Fe-hy – iron hydroxides, Kao – kaolinite, L – lithoclasts, Ph – phosphates, Pt – pistomesite, Sd – siderite, Sdp – sideropilesite, Qza – authigenic quartz, Zrn – zircon, sph – spherolite, tr – trace, cls – clayey siderite, sst – siderite sandstone; J1 – Lower Jurassic, Aa1 – Lower Aalenian, Aa2 – Upper Aalenian, Bj1 – Lower Bajocian, Bj2 – Upper Bajocian, Bt1 – Lower Bathonian, Bt2 – Middle Bathonian, Bt3- Upper Bathonian, Cl – Callovian; environment:

|          |                 |                            |                 |                         |                    |                |         |
|----------|-----------------|----------------------------|-----------------|-------------------------|--------------------|----------------|---------|
| Offshore | Transition Zone | Lower and Middle Shoreface | Upper Shoreface | Estuary – Bayhead Delta | Estuary – Mud flat | Carbonate Ramp | Fluvial |
|----------|-----------------|----------------------------|-----------------|-------------------------|--------------------|----------------|---------|

Table S2. Chemical composition of carbonates from microprobe analyses.

| Borehole          | Age    | Depth (m) | Type of rocks | Mg %wt | Ca %wt | Mn %wt | Fe %wt | MgCO <sub>3</sub> mol% | CaCO <sub>3</sub> mol% | MnCO <sub>3</sub> mol% | FeCO <sub>3</sub> mol% | Point of analysis and type of carbonate |
|-------------------|--------|-----------|---------------|--------|--------|--------|--------|------------------------|------------------------|------------------------|------------------------|-----------------------------------------|
| Gutwin            | Bj2    | 167.6     | sst           | 0.92   | 3.99   | 1.12   | 41.65  | 3.2                    | 9.8                    | 2.3                    | 84.7                   | 1 Sdp microsparite                      |
|                   |        |           |               | 1.29   | 4.39   | 0.82   | 40.70  | 4.5                    | 10.8                   | 1.7                    | 83.0                   | 2 Sdp microsparite                      |
|                   |        |           |               | 2.48   | 4.31   | 0.14   | 35.52  | 9.3                    | 11.6                   | 0.3                    | 78.8                   | 3 Sdp microsparite                      |
|                   |        |           |               | 3.15   | 5.42   | 0.00   | 36.41  | 11.0                   | 13.6                   | 0.0                    | 75.4                   | 4 Sdp microsparite                      |
|                   |        | 201.6     | sst           | 1.68   | 0.49   | 0.49   | 40.92  | 5.9                    | 8.6                    | 1.0                    | 84.5                   | 1 Sdp sparite                           |
|                   |        |           |               | 6.40   | 4.82   | 0.53   | 30.99  | 22.5                   | 12.1                   | 1.1                    | 64.3                   | 2 Pt sparite                            |
|                   |        |           |               | 7.07   | 2.55   | 0.27   | 8.35   | 25.0                   | 56.9                   | 0.6                    | 17.5                   | 3 Ank sparite                           |
|                   |        | 207.95    | sst           | 1.44   | 3.72   | 0.27   | 40.60  | 5.1                    | 9.4                    | 0.5                    | 85.0                   | 1 Sdp sparite                           |
|                   |        |           |               | 1.31   | 3.25   | 0.00   | 41.89  | 4.6                    | 8.2                    | 0.0                    | 87.2                   | 2 Sdp micrite                           |
|                   |        | 220.6     | cls           | 1.13   | 4.22   | 0.00   | 38.37  | 4.2                    | 11.2                   | 0.0                    | 84.6                   | 1 Sdp microsparite                      |
|                   |        |           |               | 2.00   | 3.87   | 0.00   | 35.08  | 7.8                    | 10.8                   | 0.0                    | 81.4                   | 3 Sdp micrite                           |
|                   |        |           |               | 1.31   | 3.59   | 0.72   | 36.93  | 5.0                    | 9.8                    | 1.7                    | 83.5                   | 4 Sdp micrite                           |
|                   |        | 225.0     | sst           | 1.59   | 4.43   | 0.26   | 40.60  | 5.4                    | 11.0                   | 0.5                    | 83.1                   | 1 Sdp sph                               |
|                   |        |           |               | 1.36   | 36.09  | 0.67   | 1.52   | 4.8                    | 90.7                   | 1.3                    | 3.2                    | 2 Cal sparite                           |
|                   |        |           |               | 0.34   | 39.42  | 0.00   | 0.24   | 1.2                    | 98.3                   | 0.0                    | 0.5                    | 3 Cal micrite                           |
|                   |        |           |               | 0.11   | 40.15  | 0.00   | 0.00   | 0.4                    | 99.6                   | 0.0                    | 0.0                    | 3a Cal micrite                          |
| Justynów<br>PIG 1 | Bj2(?) | 20.3      | cls           | 1.51   | 3.01   | 1.19   | 40.08  | 5.4                    | 7.7                    | 2.5                    | 84.4                   | 1 Sdp micrite                           |
|                   |        |           |               | 1.84   | 1.96   | 1.36   | 41.64  | 6.4                    | 4.9                    | 2.8                    | 85.9                   | 2 Sdp micrite                           |
| Mniszków<br>IG 1  | Bt2    | 916.9     | sst           | 5.00   | 1.08   | 1.51   | 36.61  | 17.7                   | 2.6                    | 3.2                    | 76.5                   | 1 Sdp micrite                           |
|                   |        |           |               | 7.19   | 21.41  | 0.55   | 9.64   | 25.2                   | 53.6                   | 1.2                    | 20.0                   | 2 Ak sparite                            |
|                   | Bt2    | 959.5     | cls           | 2.79   | 3.16   | 0.15   | 39.84  | 9.7                    | 7.9                    | 0.3                    | 82.1                   | 1 Sdp micrite                           |
|                   |        |           |               | 6.46   | 3.75   | 0.36   | 33.20  | 22.3                   | 9.2                    | 0.7                    | 67.8                   | 2 Pt sparite                            |
|                   |        |           |               | 2.53   | 3.90   | 0.11   | 39.55  | 8.8                    | 9.7                    | 0.2                    | 81.3                   | 3 Sdp sparite                           |
|                   | Bt1    | 962.0     | sst           | 3.81   | 1.49   | 1.57   | 38.60  | 13.3                   | 3.7                    | 3.3                    | 79.7                   | 1 Sdp micrite                           |
| Mołdawa           | Bt1-2  | 243.5     | sst           | 6.50   | 21.07  | 0.66   | 11.34  | 22.7                   | 52.5                   | 1.4                    | 23.4                   | 2 Ank sparite                           |
|                   |        |           |               | 2.27   | 7.00   | 0.37   | 35.64  | 7.8                    | 17.3                   | 2.1                    | 72.8                   | 1 Sdp sparite                           |
|                   |        |           |               | 5.33   | 3.93   | 0.66   | 33.43  | 18.8                   | 9.9                    | 1.4                    | 69.9                   | 2 Sdp sparite                           |
|                   |        |           |               | 6.50   | 4.77   | 0.64   | 31.40  | 22.5                   | 11.8                   | 1.3                    | 64.4                   | 3 Sdp sparite                           |
|                   | Bj2(?) | 274.1     | cls           | 6.77   | 21.21  | 0.64   | 8.29   | 24.9                   | 55.7                   | 1.4                    | 18.0                   | 4 Ank sparite                           |
|                   |        |           |               | 1.46   | 3.13   | 0.04   | 42.00  | 5.1                    | 7.8                    | 0.1                    | 87.0                   | 1 Sdp sparite                           |
|                   |        |           |               | 1.84   | 3.04   | 0.15   | 40.81  | 6.5                    | 7.7                    | 0.3                    | 85.5                   | 2 Sdp micrite                           |
|                   | Bj2    | 304.5     | cls           | 0.53   | 36.75  | 0.49   | 2.64   | 1.9                    | 91.7                   | 1.0                    | 5.5                    | 3 Cal vein                              |
|                   |        |           |               | 2.82   | 5.90   | 0.00   | 36.42  | 9.9                    | 14.7                   | 0.0                    | 75.4                   | 1 Sdp sparite                           |
|                   |        | 354.3     | sst           | 1.82   | 4.31   | 0.06   | 39.33  | 6.5                    | 10.9                   | 0.1                    | 82.5                   | 1 Sdp microsparite                      |
|                   |        |           |               | 6.00   | 4.93   | 0.29   | 31.84  | 21.0                   | 12.4                   | 0.6                    | 66.0                   | 2 Sdp microsparite                      |
|                   |        |           |               | 5.45   | 4.72   | 0.26   | 33.00  | 19.1                   | 11.9                   | 0.5                    | 68.5                   | 3 Sdp sparite                           |
|                   |        |           |               | 5.86   | 22.33  | 0.36   | 11.57  | 20.3                   | 55.3                   | 0.7                    | 23.7                   | 4 Ank sparite                           |
| Omięcin<br>XI/2   | Bj2    | 36.0      | cls           | 1.39   | 1.32   | 0.92   | 41.59  | 5.1                    | 3.4                    | 2.0                    | 89.5                   | 1 Sdp microsparite                      |
|                   |        |           |               | 0.83   | 1.92   | 2.47   | 35.18  | 3.4                    | 5.6                    | 6.0                    | 85.0                   | 2 Sdp microsparite                      |
|                   |        |           |               | 1.35   | 1.11   | 1.28   | 40.33  | 5.2                    | 3.0                    | 0.4                    | 91.4                   | 3 Sdp micrite                           |
|                   | Aa1    | 165.8     | sst           | 2.61   | 4.67   | 0.33   | 38.53  | 9.0                    | 11.5                   | 0.7                    | 78.8                   | 1 Sdp microsparite                      |
|                   |        |           |               | 2.17   | 3.96   | 0.21   | 35.77  | 8.2                    | 10.8                   | 0.5                    | 80.5                   | 2 Sdp microsparite                      |
|                   |        |           |               | 2.47   | 4.62   | 0.18   | 35.19  | 9.2                    | 12.4                   | 0.4                    | 78.0                   | 3 Sdp microsparite                      |
|                   |        |           |               | 2.58   | 3.99   | 0.54   | 35.84  | 9.6                    | 10.6                   | 1.1                    | 78.7                   | 4 Sdp micrite                           |
|                   |        |           |               | 1.41   | 2.90   | 0.33   | 37.76  | 5.3                    | 8.0                    | 0.8                    | 85.9                   | 5 Sdp micrite                           |
|                   |        |           |               | 1.26   | 3.44   | 0.40   | 37.83  | 4.8                    | 9.3                    | 0.9                    | 85.0                   | 6 Sdp micrite                           |
|                   |        |           |               | 2.27   | 4.38   | 0.00   | 33.72  | 10.5                   | 12.1                   | 0.0                    | 77.4                   | 7 Sdp microsparite                      |
|                   |        | 179.0     | sst           | 1.94   | 4.09   | 0.00   | 37.11  | 7.2                    | 10.9                   | 0.0                    | 81.9                   | 1 Sdp microsparite                      |
|                   |        |           |               | 2.29   | 4.30   | 0.00   | 33.14  | 9.2                    | 12.3                   | 0.0                    | 78.5                   | 2 Sdp microsparite                      |
|                   |        |           |               | 1.35   | 2.39   | 0.50   | 37.64  | 4.7                    | 17.5                   | 1.0                    | 76.8                   | 3 Sdp sparite                           |
|                   |        |           |               | 2.35   | 3.84   | 0.00   | 37.70  | 8.6                    | 10.0                   | 0.0                    | 81.4                   | 4 Sdp sparite                           |

|                 |                       |      |       |       |       |       |       |       |       |      |               |                    |               |               |
|-----------------|-----------------------|------|-------|-------|-------|-------|-------|-------|-------|------|---------------|--------------------|---------------|---------------|
|                 |                       |      | 2.78  | 4.42  | 0.00  | 37.04 | 10.0  | 11.3  | 0.0   | 78.7 | 5 Sdp sparite |                    |               |               |
| Omięcin<br>XI/3 |                       | cls  | 132.2 | 3.38  | 3.18  | 0.39  | 36.10 | 12.4  | 8.3   | 0.9  | 78.4          | 1 Sdp sparite      |               |               |
|                 |                       |      |       | 5.29  | 4.05  | 0.15  | 30.87 | 20.0  | 10.9  | 0.3  | 68.8          | 3 Pt sparite       |               |               |
|                 |                       |      |       | 3.16  | 3.12  | 0.00  | 33.90 | 12.4  | 8.8   | 0.0  | 78.8          | 2 Sdp sparite      |               |               |
|                 |                       |      |       | 6.09  | 4.06  | 1.10  | 32.43 | 21.1  | 10.1  | 2.3  | 66.5          | 2a Pt sparite      |               |               |
|                 |                       |      |       | 3.13  | 2.91  | 0.13  | 35.36 | 12.0  | 7.9   | 0.3  | 79.8          | 3 Sdp sparite      |               |               |
|                 |                       |      |       | 2.63  | 3.60  | 0.10  | 37.62 | 9.6   | 9.3   | 0.2  | 80.9          | 5 Sdp sparite      |               |               |
|                 |                       |      |       | 2.63  | 3.47  | 0.01  | 39.83 | 9.2   | 8.6   | 0.0  | 82.2          | 6a Sdp micrite     |               |               |
|                 |                       |      |       | 3.47  | 3.99  | 0.11  | 37.12 | 12.2  | 10.1  | 0.2  | 77.5          | 7 Sdp microsparite |               |               |
|                 | Bj2                   | cls  | 144.5 | 8.31  | 23.77 | 1.06  | 7.31  | 27.5  | 56.2  | 2.0  | 14.3          | 1 Ank sparite      |               |               |
|                 |                       |      |       | 7.07  | 23.11 | 0.87  | 7.74  | 24.7  | 57.6  | 1.7  | 16.0          | 2 Ank sparite      |               |               |
|                 |                       |      | 7.17  | 22.78 | 0.87  | 6.85  | 25.6  | 58.1  | 1.8   | 14.5 | 3 Ank sparite |                    |               |               |
| Omięcin<br>XI/3 |                       | cls  | 144.5 | 1.72  | 2.88  | 0.47  | 36.49 | 6.7   | 8.0   | 1.1  | 84.2          | 5 Sdp sph          |               |               |
|                 |                       |      |       | 2.08  | 3.51  | 0.48  | 35.31 | 8.1   | 9.7   | 1.1  | 81.1          | 6 Sdp sph          |               |               |
|                 |                       |      | Bj2   | sst   | 172.9 | 7.13  | 24.03 | 1.19  | 8.33  | 23.8 | 57.3          | 2.4                | 16.5          | 1 Ank sparite |
|                 |                       | 5.89 |       |       | 4.56  | 0.00  | 28.06 | 22.9  | 12.6  | 0.0  | 64.5          | 2 Pt sparite       |               |               |
|                 |                       | 6.39 |       |       | 6.27  | 0.31  | 28.47 | 22.9  | 16.0  | 0.7  | 60.4          | 3 Pt sparite       |               |               |
|                 |                       | 4.41 |       |       | 4.61  | 0.32  | 33.15 | 16.0  | 12.0  | 0.7  | 71.3          | 4 Sdp sparite      |               |               |
|                 |                       | 6.63 |       |       | 25.85 | 0.77  | 6.61  | 22.8  | 63.5  | 0.2  | 13.5          | 5 Ank sparite      |               |               |
|                 |                       | 6.09 |       |       | 23.72 | 1.29  | 9.46  | 20.7  | 57.6  | 2.6  | 19.1          | 6 Ank sparite      |               |               |
|                 |                       | 2.33 |       |       | 4.71  | 0.94  | 38.77 | 8.2   | 11.5  | 1.9  | 78.4          | 7 Sdp sparite      |               |               |
|                 |                       | 5.01 |       |       | 4.82  | 0.44  | 32.36 | 18.0  | 12.3  | 1.0  | 68.7          | 8 Pt sparite       |               |               |
|                 |                       | 4.41 |       |       | 3.42  | 0.22  | 34.44 | 16.1  | 8.9   | 0.5  | 74.5          | 9 Sdp sparite      |               |               |
|                 | Bj1                   | sst  | 203.9 | 2.91  | 3.53  | 0.29  | 37.73 | 10.4  | 9.0   | 0.6  | 80.0          | 1 Sdp sparite      |               |               |
|                 |                       |      |       | 6.94  | 22.97 | 0.28  | 10.12 | 23.5  | 55.6  | 0.6  | 20.3          | 2 Ank sparite      |               |               |
|                 |                       |      |       | 3.22  | 3.50  | 0.00  | 36.05 | 11.9  | 9.2   | 0.0  | 78.9          | 3 Sdp sparite      |               |               |
|                 |                       |      |       | 2.77  | 3.47  | 0.20  | 36.67 | 10.5  | 9.1   | 0.4  | 80.2          | 3a Sdp sparite     |               |               |
|                 |                       |      |       | 2.86  | 3.41  | 0.33  | 36.55 | 10.5  | 9.0   | 0.7  | 79.8          | 4 Sdp sparite      |               |               |
|                 |                       |      |       | 7.17  | 22.01 | 0.44  | 9.42  | 25.0  | 54.7  | 0.9  | 19.4          | 5 Ank sparite      |               |               |
|                 | Aa1                   | cls  | 225.0 | 2.21  | 2.54  | 0.00  | 38.98 | 8.2   | 6.7   | 0.0  | 85.1          | 1 Sdp sparite      |               |               |
|                 |                       |      |       | 1.95  | 3.21  | 1.00  | 39.30 | 6.9   | 8.2   | 2.1  | 82,8          | 2 Sdp sparite      |               |               |
|                 | Aa1-J1<br>(?)         | cls  | 234.0 | 2.38  | 3.65  | 0.00  | 39.27 | 8.4   | 9.2   | 0.0  | 82.3          | 1 Sdp micrite      |               |               |
|                 |                       |      |       | 2.39  | 3.94  | 0.00  | 37.08 | 8.8   | 10.4  | 0.0  | 80.8          | 2 Sdp micrite      |               |               |
|                 |                       |      |       | 2.04  | 3.63  | 0.00  | 39.25 | 7.3   | 9.3   | 0.0  | 83.4          | 3 Sdp sparite      |               |               |
|                 |                       |      |       | 2.00  | 3.99  | 0.00  | 38.13 | 7.3   | 10.4  | 0.0  | 82.3          | 4 Sdp sparite      |               |               |
|                 | Waglany k/<br>Opoczna |      | cls   | 395.2 | 3.48  | 3.59  | 0.00  | 33.22 | 13.5  | 10.0 | 0.0           | 76.5               | 1 Sdp sparite |               |
|                 |                       |      |       |       | 3.48  | 2.22  | 0.00  | 36.79 | 13.0  | 5.9  | 0.0           | 81.3               | 2 Sdp sparite |               |
|                 |                       |      |       |       | 2.59  | 2.37  | 0.56  | 38.84 | 9.4   | 6.1  | 1.2           | 83.3               | 3 Sdp micrite |               |
|                 |                       |      |       |       | 2.02  | 3.06  | 0.73  | 37.17 | 7.6   | 8.2  | 1.6           | 82.6               | 4 Sdp micrite |               |
|                 |                       |      | cls   | 400.0 | 3.94  | 1.18  | 0.49  | 36.78 | 14.7  | 3.1  | 1.1           | 81.1               | 1 Sdp sparite |               |
|                 |                       |      |       | 4.26  | 1.40  | 0.57  | 36.54 | 15.7  | 3.6   | 1.3  | 79.4          | 2 Sdp sparite      |               |               |
|                 |                       |      |       | 5.48  | 0.30  | 0.05  | 35.88 | 20.3  | 0.8   | 0.1  | 78.8          | 3 Sdp sparite      |               |               |
|                 |                       |      |       | 4.11  | 1.04  | 0.40  | 37.18 | 15.2  | 2.7   | 0.9  | 81.2          | 4 Sdp micrite      |               |               |
|                 |                       |      |       | 6.65  | 2.83  | 0.24  | 29.20 | 25.5  | 7.8   | 0.5  | 66.2          | 5 Pt sparite       |               |               |
|                 |                       |      |       | 3.33  | 1.38  | 0.23  | 37.97 | 12.4  | 3.7   | 0.5  | 83.4          | 6 Sdp micrite      |               |               |
| Bt1-2           |                       |      |       | cls   | 412.4 | 2.00  | 4.54  | 0.00  | 35.52 | 7.6  | 12.4          | 0.0                | 80.0          | 1 Sdp sparite |
|                 |                       |      |       |       |       | 2.60  | 4.40  | 0.00  | 35.99 | 9.6  | 11.6          | 0.0                | 78.8          | 2 Sdp sparite |
|                 |                       |      | 2.08  |       | 2.73  | 0.61  | 38.79 | 3.9   | 7.4   | 1.4  | 87.3          | 3 Sdp sparite      |               |               |
|                 |                       |      | 2.52  |       | 4.17  | 0.06  | 35.46 | 9.5   | 11.2  | 0.1  | 79.2          | 4 Sdp micrite      |               |               |
|                 |                       |      | 2.03  |       | 2.40  | 0.23  | 37.79 | 7.8   | 6.5   | 0.5  | 85.2          | 5 Sdp micrite      |               |               |
|                 |                       |      | 419.2 |       | 6.63  | 17.97 | 0.55  | 9.47  | 26.1  | 50.5 | 1.3           | 22.1               | 1 Ank sparite |               |
| Bj2             |                       | cls  |       | 5.37  | 3.63  | 0.17  | 31.82 | 20.0  | 9.7   | 0.4  | 69.9          | 2 Pt sparite       |               |               |
|                 |                       |      |       | 3.77  | 2.56  | 0.63  | 31.94 | 15.2  | 7.3   | 1.5  | 76.0          | 3 Sdp microsparite |               |               |
|                 |                       |      | 465.5 | 7.02  | 1.27  | 0.74  | 26.85 | 29.0  | 3.8   | 1.7  | 65.5          | 1 Pt microsparite  |               |               |
|                 |                       | cls  |       | 2.92  | 1.30  | 0.53  | 27.09 | 14.4  | 4.5   | 1.6  | 79.5          | 2 Sdp micrite      |               |               |
|                 |                       |      | 597.2 | 8.68  | 1.23  | 0.13  | 29.51 | 32.0  | 3.3   | 0.3  | 64.4          | 1 Pt sparite       |               |               |

|                       |        |     |  |      |       |      |       |      |      |     |      |                    |
|-----------------------|--------|-----|--|------|-------|------|-------|------|------|-----|------|--------------------|
| Aa1                   | 600.2  | sst |  | 0.22 | 0.43  | 1.54 | 42.66 | 0.8  | 1.2  | 3.4 | 94.6 | 2 Sd sparite       |
|                       |        |     |  | 5.21 | 2.75  | 0.23 | 31.95 | 19.9 | 7.5  | 0.5 | 72.1 | 3 Sdp sparite      |
|                       |        |     |  | 8.51 | 1.40  | 0.29 | 28.41 | 32.1 | 3.8  | 0.7 | 63.4 | 4 Pt sparite       |
|                       |        |     |  | 3.31 | 1.51  | 0.21 | 35.74 | 12.9 | 4.2  | 0.5 | 82.4 | 5 Sdp micrite      |
|                       |        |     |  | 1.04 | 0.98  | 1.17 | 41.16 | 3.9  | 2.6  | 2.6 | 90.9 | 6 Sdp micrite      |
|                       |        |     |  | 6.10 | 0.94  | 0.35 | 27.72 | 26.3 | 2.9  | 0.9 | 69.9 | 1 Pt sparite       |
|                       |        |     |  | 5.17 | 1.30  | 0.95 | 22.95 | 25.5 | 4.6  | 2.8 | 67.1 | 1a Pt sparite      |
|                       |        |     |  | 5.14 | 0.64  | 0.56 | 30.55 | 21.4 | 1.9  | 1.4 | 75.3 | 2 Sdp microsparite |
|                       |        |     |  | 5.94 | 1.15  | 1.29 | 27.80 | 24.0 | 3.5  | 3.2 | 69.3 | 3 Pt microsparite  |
|                       | 643.8  | sst |  | 3.43 | 1.34  | 1.83 | 35.02 | 13.1 | 3.6  | 4.2 | 79.1 | 1 Sdp sparite      |
|                       |        |     |  | 0.98 | 0.14  | 0.85 | 40.02 | 3.9  | 0.4  | 2.0 | 93.7 | 3 Sdp sparite      |
|                       |        |     |  | 3.74 | 2.14  | 1.41 | 33.36 | 14.5 | 5.9  | 3.3 | 76.3 | 2 Sdp sparite      |
|                       |        |     |  | 2.25 | 0.66  | 1.06 | 35.68 | 9.2  | 1.9  | 2.6 | 86.3 | 4 Sdp sph          |
|                       |        |     |  | 1.85 | 0.67  | 1.54 | 36.92 | 7.6  | 2.8  | 3.4 | 86.2 | 5 Sdp sph          |
| Władysław             | 200.5  | sst |  | 0.25 | 35.67 | 1.95 | 2.41  | 0.9  | 90.0 | 4.1 | 5.0  | 1 Cal sparite      |
|                       |        |     |  | 0.40 | 36.05 | 1.48 | 2.16  | 1.4  | 91.0 | 3.1 | 4.5  | 1a Cal sparite     |
|                       |        |     |  | 0.40 | 38.30 | 0.21 | 1.51  | 1.4  | 95.1 | 0.4 | 3.1  | 2 Cal sparite      |
|                       |        |     |  | 1.48 | 4.19  | 0.73 | 40.50 | 5.1  | 10.4 | 1.5 | 83.0 | 3 Sdp sparite      |
|                       |        |     |  | 5.18 | 4.25  | 0.52 | 33.91 | 18.1 | 10.6 | 1.1 | 70.2 | 3a Sdp sparite     |
|                       | 311.2  | sst |  | 0.84 | 6.11  | 0.00 | 39.35 | 3.0  | 15.3 | 0.0 | 81.7 | 1 Sdp sph          |
|                       |        |     |  | 0.34 | 37.17 | 0.42 | 2.22  | 1.2  | 93.3 | 0.8 | 4.7  | 2 Cal              |
| Wyszmon-<br>tów 1     | 77.5-  | cls |  | 1.53 | 3.15  | 0.12 | 42.00 | 5.3  | 7.8  | 0.3 | 86.6 | 1 Sdp microsparite |
|                       |        |     |  | 1.26 | 4.46  | 0.00 | 40.73 | 4.4  | 11.2 | 0.0 | 84.4 | 2 Sdp micrite      |
|                       |        |     |  | 1.51 | 4.25  | 0.22 | 36.32 | 5.8  | 11.6 | 0.5 | 82.1 | 1 Sdp sparite      |
|                       |        |     |  | 1.17 | 3.86  | 0.00 | 34.42 | 4.8  | 11.4 | 0.0 | 83.8 | 2 Sdp sparite      |
|                       |        |     |  | 1.40 | 3.27  | 0.00 | 38.74 | 5.2  | 8.8  | 0.0 | 86.0 | 3 Sdp micrite      |
|                       | 80.5   | cls |  | 2.71 | 5.72  | 0.00 | 33.64 | 10.2 | 15.3 | 0.0 | 74.5 | 4 Sdp micrite      |
|                       |        |     |  | 1.45 | 3.72  | 0.00 | 35.39 | 5.8  | 10.6 | 0.0 | 83.6 | 5 Sdp micrite      |
| Wyszmon-<br>tów PIG 2 | Bj2(?) | cls |  | 1.37 | 6.34  | 0.28 | 37.18 | 4.9  | 16.1 | 0.6 | 78.4 | 1 Sdp micrite      |
|                       |        |     |  |      |       |      |       |      |      |     |      |                    |

Legend as in table S1.

Table S3. Composition of sideritic sandstones (vol. %)\*

| Borehole         | Depth [m] | Age   | Siderite | Carbonates | Clay Minerals | Quartz | Feldspars | Micas | Ooids | Intraclast | Bioclast | Pyrite | Organic Matter | Other    |
|------------------|-----------|-------|----------|------------|---------------|--------|-----------|-------|-------|------------|----------|--------|----------------|----------|
| Gutwin           | 124.2     | Bt1-2 | 15.3     | 0.0        | 12.7          | 59.0   | 2.3       | 0.0   | 4.4   | 3.0        | 3.3      | 0.0    | 0.0            | 0.0      |
|                  | 165.2     | Bt1-2 | 19.0     | 27.6 Ank   | 0.3           | 48.7   | 1.4       | 0.0   | 0.0   | 0.0        | tr       | 3.0    | 0.0            | 0.0      |
|                  | 167.6     | Bj2   | 41.3     | 0.0        | 1.3           | 54.7   | 0.3       | 0.7   | 1.3   | 0.0        | 0.0      | 0.4    | 0.0            | 0.0      |
|                  | 190.9     | Bj2   | 19.7     | 19.3 Ank   | 2.3           | 56.0   | 1.0       | 0.0   | 0.0   | 1.0        | tr       | 0.7    | 0.0            | tr Zrn   |
|                  | 191.5     | Bj2   | 39.7     | 0.0        | 1.7           | 53.3   | 0.7       | 0.0   | 3.0   | 0.0        | 1.3      | 0.3    | 0.0            | 0.0      |
|                  | 201.6     | Bj2   | 28.0     | 12.7 Ank   | 0.0           | 58.7   | 0.6       | 0.0   | 0.0   | 0.0        | tr       | 0.0    | 0.0            | 0.0      |
|                  | 207.95    | Bj2   | 47.3     | 0.0        | 0.7           | 45.7   | 5.7       | 0.3   | 0.0   | 0.0        | tr       | 0.3    | 0.0            | 0.0      |
|                  | 222.2     | Bj2   | 36.0     | 1.7 Ank    | 0.7           | 48.3   | 0.7       | 0.0   | 0.0   | 0.0        | 12.3     | 0.3    | 0.0            | tr Kao   |
|                  | 225.0     | Bj2   | 16.0     | 25.0 Cal   | 0.0           | 56.3   | 1.3       | 0.0   | 0.0   | 0.0        | 1.4      | 0.0    | 0.0            | 0.0      |
|                  | 279.9     | Bj1   | 1.0      | 20.0 Cal   | 23.9 cl-fe    | 45.0   | 1.0       | 2.4   | 0.0   | 0.0        | 0.0      | 1.7    | 0.0            | 5.0Hm    |
| Mniszków<br>IG 1 | 915.5     | Bt2   | 2.0      | 38.0 Ank   | 2.0           | 47.0   | 1.3       | 0.0   | 0.0   | 1.0        | 8.7      | 0.0    | 0.0            | 0.0      |
|                  | 916.9     | Bt2   | 34.0     | 14.6 Ank   | 1.3           | 40.4   | 1.0       | 0.0   | 0.0   | 2.3        | 4.7      | 1.7    | 0.0            | 0.0      |
|                  | 918.6     | Bt2   | 33.0     | 13.2 Ank   | 3.7           | 29.2   | 0.0       | 0.7   | 0.0   | 1.0        | 18.5     | 0.7    | 0.0            | tr Zrn   |
|                  | 919.7     | Bt1   | 10.3     | 34.0 Ank   | 1.3           | 51.7   | 1.3       | 0.0   | 0.0   | 0.0        | 0.7      | 0.7    | 0.0            | 0.0      |
|                  | 962.0     | Bj2   | 27.3     | 14.0 Ank   | 8.6           | 47.4   | 0.0       | 0.0   | 1.0   | 0.0        | 0.0      | 0.0    | 1.4            | 0.3Kao   |
|                  | 1102.8    | Aa2   | 0.7      | 0.0        | 25.7          | 57.0   | 1.0       | 10.0  | 0.0   | 0.0        | 0.0      | 0.0    | 3.6            | 2.0Kao   |
| Mołdawa          | 109.0     | Bt1-2 | 26.7     | 0.0        | 4.7           | 62.3   | 1.0       | 0.0   | 2.3   | 0.0        | 2.0      | tr     | 0.0            | 1.0Qza L |
|                  | 113.4     | Bt1-2 | 4.9      | 22.0 Ank   | 13.0          | 44.7   | 1.0       | 0.0   | 1.7   | 0.0        | 11.3     | 0.7    | 0.0            | 0.7Gth   |
|                  | 123.6     | Bt1-2 | 0.3      | 30.0 Ank   | 9.0           | 38.7   | 3.7       | 0.0   | 10.   | 0.0        | 7.3      | 0.0    | 0.3            | 0.0      |
|                  | 168.7     | Bt1-2 | 13.7     | 23.7 Ank   | 7.7           | 44.3   | 1.3       | 0.0   | 0.0   | 0.0        | 9.3      | 0.0    | 0.0            | 0.0      |
|                  | 208.0     | Bt1-2 | 2.7      | 24.7 Ank   | 7.3           | 51.3   | 0.3       | 0.3   | 1.7   | 0.0        | 9.7      | 2.0    | 0.0            | 0.0      |
|                  | 216.7     | Bt1-2 | 12.3     | 0.8 Cal    | 11.0          | 69.3   | 4.0       | 0.3   | 0.7   | 0.0        | 0.3      | 0.0    | 0.3            | 1.0Qza   |
|                  | 228.7     | Bt1-2 | 37.7     | 11.3 Ank   | 0.7           | 48.3   | 2.0       | 0.0   | 0.0   | 0.0        | 0.0      | 0.0    | 0.0            | 0.0      |
|                  | 229.6     | Bt1-2 | 25.0     | 0.0        | 0.7           | 69.0   | 2.0       | 0.0   | 0.0   | 0.0        | 0.0      | 0.0    | 0.0            | 3.3Qza   |
|                  | 243.5     | Bt1-2 | 44.0     | 3.7 Ank    | 0.0           | 51.3   | 1.0       | 0.0   | 0.0   | 0.0        | 0.0      | 0.0    | 0.0            | 0.0      |
|                  | 250.75    | Bt1-2 | 24.3     | 1.7 Ank    | 3.0           | 16.3   | 1.3       | 0.0   | 44.7  | 0.0        | 8.0      | 0.0    | 0.0            | 0.7L     |
|                  | 281.5     | Bj2?  | 25.0     | 10.7 Cal   | 0.4           | 56.3   | 0.7       | 0.0   | 3.3   | 0.0        | 2.0      | 0.3    | 0.0            | 0.6Zrn L |
|                  | 303.4     | Bj2   | 29.3     | 0.0        | 7.0           | 50.3   | 1.7       | 1.3   | 0.0   | 1.3        | 4.3      | 0.0    | 3.3            | 1.5Qza   |
|                  | 308.0     | Bj2   | 29.0     | 4.3 Cal    | 0.3           | 45.7   | 0.0       | 0.0   | 17.0  | 0.3        | 1.0      | 0.7    | 0.3            | 1.3L     |
|                  | 321.8     | Bj2   | 36.7     | 0.3 Cal    | 4.7           | 44.3   | 2.0       | 0.0   | 7.3   | 0.0        | 2.4      | 0.0    | 1.3            | 1.0L     |
|                  | 347.0     | Bj2   | 40.0     | 4.7 Cal    | 0.0           | 40.3   | 3.7       | 0.0   | 6.7   | 0.0        | 0.0      | 0.0    | 0.0            | 4.6L     |
|                  | 352.0     | Bj2   | 20.7     | 25.0 Ank   | 0.0           | 51.7   | 0.3       | 0.0   | 0.3   | 0.0        | 0.0      | 0.3    | 0.3            | 1.4Kao   |



|                       |             |           |      |              |            |      |     |      |      |     |      |      |     |            |
|-----------------------|-------------|-----------|------|--------------|------------|------|-----|------|------|-----|------|------|-----|------------|
|                       | 354.3       | Bj2       | 45.0 | 3.7 Ank      | 0.7        | 40.6 | 1.0 | 0.0  | 0.7  | 0.0 | 2.3  | 0.0  | 6.0 | 0.0        |
|                       | 355.8       | Bj2       | 25.0 | 19.4 Ank     | 1.3        | 54.0 | 0.3 | 0.0  | 0.0  | 0.0 | 0.0  | 0.0  | 0.0 | 0.0        |
|                       | 369.0       | Bj2       | 10.0 | 77 Cal       | 3          | 7.0  | 0.0 | 0.0  | 0.0  | 0.0 | 1.0  | 1.0  | 1.0 | 0.0        |
|                       | 373.5       | Bj2       | 10.0 | 0.0          | 31.0 cl-fe | 49.0 | 1.0 | 2.0  | 0.0  | 0.0 | tr   | 1.0  | 6.0 | 0.0        |
|                       | 387.7       | Bj2       | 34.3 | tr           | 0.3        | 5.7  | 0.0 | 0.3  | 55.7 | 0.0 | 3.7  | 0.0  | 0.0 | 0.0        |
| Omięcin XI/2          | 57.8        | Bj2       | 29.0 | 0.0          | 1.3        | 35.7 | 1.3 | 1.7  | 0.0  | 0.0 | 0.0  | 31.0 | 0.0 | 0.0        |
|                       | 77.9-78.9   | Bj2       | 39.3 | 0.0          | 0.0        | 41.0 | 0.3 | 0.0  | 0.7  | 3.0 | 15.4 | 0.0  | 0.3 | 0.0        |
|                       | 97.9-98.9   | Bj2       | 18.0 | 18.3 Ank     | 1.4        | 58.0 | 1.0 | 0.3  | 0.0  | 0.3 | 1.7  | 0.3  | 0.7 | 0.0        |
|                       | 105.4       | Bj1       | 30.0 | 14.7 Cal     | 5.0        | 46.7 | 0.0 | 0.0  | 2.0  | 0.3 | 1.0  | 1.0  | 0.0 | 0.3 Zrn    |
|                       | 107.0-108.0 | Bj1       | 31.4 | 0.0          | 0.3        | 67.7 | 0.6 | 0.0  | 0.0  | 0.0 | 0.0  | 0.0  | 0.0 | tr Kao     |
|                       | 110.2       | Bj1       | 41.0 | 0.0          | 4.6        | 52.7 | 0.3 | 0.0  | 0.0  | 0.0 | 0.0  | 0.0  | 0.7 | 0.7Kao     |
|                       | 115.5       | Aa2       | 30.0 | 0.0          | 3.0        | 61.0 | 0.7 | 0.6  | 0.0  | 0.0 | 0.0  | 4.7  | 0.0 | 0.0        |
|                       | 165.8       | Aa1-J1(?) | 34.0 | 0.0          | 0.3        | 61.4 | 1.3 | 0.0  | 0.0  | 2.3 | 0.7  | 0.0  | 0.0 | 0.0        |
|                       | 176.0       | Aa1-J1(?) | 41.0 | 0.0          | 1.0        | 57.4 | 0.0 | 0.3  | 0.0  | 0.0 | 0.0  | 0.3  | 0.0 | 0.0        |
|                       | 179.0       | Aa1-J1(?) | 37.3 | 0.0          | 1.0        | 59.4 | 2.0 | 0.0  | 0.0  | 0.0 | 0.0  | 0.3  | 0.0 | tr Zrn     |
|                       | 183.3       | Aa1-J1(?) | 21.0 | 0.0          | 0.4        | 76.3 | 2.3 | 0.0  | 0.0  | tr  | 0.0  | 0.0  | 0.0 | 0.0        |
|                       | 169.0       | Bj2       | 20.3 | 0.0          | 26.7       | 29.3 | 0.3 | 19.0 | 0.0  | 0.0 | 0.0  | 0.0  | 4.4 | 0.0        |
| Omięcin XI/3          | 172.9       | Bj2       | 24.0 | 15.0 Ank     | 2.4        | 37.3 | 0.0 | 0.0  | 3.0  | 5.0 | 13.3 | 0.0  | 0.0 | 0.0        |
|                       | 183.7       | Bj2       | 15.7 | 23.0 Ank     | 3.3 cl-fe  | 41.7 | tr  | 0.0  | 0.0  | 0.0 | 16.3 | 0.0  | 0.0 | 0.0        |
|                       | 202.9       | Bj1(?)    | 19.7 | 19.7 Ank     | 3.4        | 47.3 | 0.0 | 0.3  | 0.3  | 0.0 | 9.0  | 0.0  | 0.3 | 0.0        |
|                       | 203.9       | Bj1(?)    | 43.0 | 4.0 Ank      | 0.0        | 33.6 | 0.7 | 0.0  | 0.0  | 2.7 | 16.0 | 0.0  | 0.0 | 0.0        |
|                       | 210.2       | Aa2       | 19.0 | 0.0          | 22.3 cl-fe | 41.0 | 1.0 | 11.7 | 0.0  | 0.0 | 0.0  | tr   | 5.0 | 0.0        |
| Waglany k/<br>Opoczna | 316.4       | Bt1-2     | 33.0 | 10.0 Ank     | 6.5        | 34.3 | 0.3 | 0.3  | 0.0  | 0.0 | 15.3 | 0.0  | 0.3 | 0.0        |
|                       | 455.0       | Bj2       | 33.4 | 0.0          | 3.3        | 59.0 | 0.0 | 1.0  | 0.0  | 0.0 | 0.0  | 0.0  | 0.3 | 3.0Kao     |
|                       | 482.7       | Bj2       | 8.3  | 32.6 Ank     | 5.0        | 38.0 | 0.0 | 0.7  | 4.0  | 3.0 | 4.7  | 3.7  | 0.0 | 0.0        |
|                       | 493.8       | Bj2       | 15.6 | 28.3 Ank     | 6.0        | 47.8 | 0.0 | 1.3  | 0.0  | 0.3 | 0.0  | 0.0  | 0.7 | 0.0        |
|                       | 531.0       | Bj2       | 31.7 | 10.3 Ank     | 8.0        | 43.7 | 0.0 | 3.0  | 0.0  | 0.0 | 1.3  | 0.0  | 2.0 | 0.0        |
|                       | 600.2       | Aa1       | 32.7 | 0.0          | 1.6        | 64.7 | 0.7 | 0.0  | 0.0  | 0.0 | 0.0  | 0.0  | 0.3 | 0.0        |
|                       | 643.8       | Aa1       | 43.7 | 0.0          | 1.4 cl-fe  | 49.3 | 0.3 | 0.0  | 5.3  | 0.0 | 0.0  | 0.0  | 0.0 | 0.0        |
| Władysław             | 166.8       | Bt1-2     | 1.3  | 11.0 Cal Ank | 12.0       | 65.3 | 2.3 | 0.0  | 0.0  | 0.0 | 5.0  | 0.7  | 0.0 | 1.4Qza Glt |
|                       | 184.0       | Bt1-2     | 26.3 | 0.0          | 0.0        | 63.7 | 3.7 | 0.0  | 0.0  | 0.0 | 0.0  | 0.0  | 0.0 | 6.3Gth Hm  |
|                       | 200.5       | Bt1-2     | 16.3 | 12.0 Cal     | 6.3        | 55.7 | 0.7 | 0.0  | 3.7  | 0.0 | 4.7  | 0.0  | 0.0 | 0.6Fe-hy   |
|                       | 308.45      | Bj2       | 19.0 | 19.4 Cal     | 1.0        | 59.0 | 1.0 | 0.0  | 0.0  | 0.0 | 0.0  | 0.3  | 0.0 | 0.3Qza     |
|                       | 311.2       | Bj2       | 15.3 | 22.7 Cal     | 0.0        | 61.7 | 0.0 | 0.0  | 0.0  | 0.0 | 0.0  | 0.0  | 0.0 | 0.3L       |
|                       | 377.4       | Bj2       | 2.0  | 0.0          | 36 cl-fe   | 49.0 | 1.0 | 6.0  | 0.0  | 0.0 | 0.0  | 1.0  | 5.0 | 0.0        |
| Wyszmontów            | 85.0        | Bt1-2     | 30.0 | 10.4 Cal     | 9.6        | 33.6 | 0.0 | 0.7  | 0.0  | 0.7 | 14.0 | 0.0  | 1.0 | 0.0        |

|              |        |        |      |          |          |      |     |     |      |     |     |     |      |           |
|--------------|--------|--------|------|----------|----------|------|-----|-----|------|-----|-----|-----|------|-----------|
| 1            | 91.6   | Bj2    | 25.3 | 9.7 Cal  | 10.0     | 42.3 | 0.7 | 0.0 | 4.0  | 0.7 | 4.7 | 0.0 | 2.6  | 0.0       |
|              | 91.7   | Bj2    | 22.7 | 13.3 Cal | 13.0     | 30.0 | 0.0 | 0.0 | 16.7 | 1.3 | 3.0 | 0.0 | 0.0  | 0.0       |
| Zalesie      | 191.85 | Bt1-2? | 23.3 | 0.0      | 17.7     | 43.7 | 4.0 | 2.7 | 0.0  | 0.0 | 0.0 | 0.0 | 0.0  | 8.6Hm Qza |
| Antoniowskie | 279.8  | Aa2    | 15.0 | 0.0      | 21 cl-fe | 48.0 | 2.0 | 3.0 | 0.0  | 0.0 | 0.0 | 1.0 | 10.0 | 0.0       |

Legend as in table S1.

**Table S4.** Composition of sideritic coquinas (vol. %)\*

| Borehole     | Depth (m) | Age   | Bioclasts | Siderite | Other Carbonates | Clay Minerals | Quartz | Ooids | Intra-clast | Pyrite | Organic Matter | Other    |
|--------------|-----------|-------|-----------|----------|------------------|---------------|--------|-------|-------------|--------|----------------|----------|
| Władysław    | 157.5     | Bt1-2 | 29.8      | 15.3     | 26.0 Cal         | 4.3           | 15.3   | 2.3   | 0.0         | 0.0    | 0.0            | 7.0 L Fs |
|              | 194.0     | Bt1-2 | 22.7      | 19.4     | 15.7 Ank Cal     | 6.3           | 31.3   | 2.3   | 0.0         | 0.0    | 0.0            | 2.3 Fs L |
| Wyszmontów 1 | 99.3      | Bj2   | 31.3      | 16.3     | 23.0 Ank         | 5.4           | 5.0    | 6.7   | 11.7        | 0.3    | 0.3            | 0.0      |

Legend as in table S1.

**Table S5.** Isotopic ratios of carbon and oxygen in carbonate cements (values of  $\delta^{18}\text{O}_{\text{VSMOW}}$  of crystalline water for sideroplesite precipitated in temperature 20 °C).

| Borehole         | Age        | Depth (m)   | Type of Rocks | Type of Carbonate | $\delta^{13}\text{C}_{\text{VPDB}}$<br>‰ | $\delta^{18}\text{O}_{\text{VPDB}}$<br>‰ | $\delta^{18}\text{O}_{\text{VSMOW}}$<br>‰ | $\delta^{18}\text{O}_{\text{VSMOW}}$<br>H <sub>2</sub> O ‰ |
|------------------|------------|-------------|---------------|-------------------|------------------------------------------|------------------------------------------|-------------------------------------------|------------------------------------------------------------|
| Gutwin           | Bt1-2      | 124.2       | sst           | Pt                | −1.82                                    | −1.23                                    | 29.58                                     | −                                                          |
|                  | Bt1-2      | 147.7       | cls           | Sdp               | −15.13                                   | −0.51                                    | 30.33                                     | −3.55                                                      |
|                  |            | 164.15      | cls           | Sdp               | −22.42                                   | −0.46                                    | 30.38                                     | −3.50                                                      |
|                  | Bj2        | 167.6       | sst           | Sdp               | −24.58                                   | 0.60                                     | 31.47                                     | −2.41                                                      |
|                  |            | 191.5       | cls           | Sdp               | −15.15                                   | 1.70                                     | 32.67                                     | −1.27                                                      |
|                  |            | 222.2       | sst           | Sdp               | −2.19                                    | 3.97                                     | 31.50                                     | 1.07                                                       |
|                  |            | 232.7–233.0 | cls           | Sdp               | −4.70                                    | −2.98                                    | 27.79                                     | −6.10                                                      |
| Justynów PIG 1   | Bj2 (?)    | 20.3        | cls           | Sdp               | −0.03                                    | 0.62                                     | 31.50                                     | −2.39                                                      |
|                  |            | 25.5        | cls           | Sdp               | −7.73                                    | −4.73                                    | 25.99                                     | −7.90                                                      |
| Mnisków IG 1     | Bt1        | 958.4       | cls           | Sdp               | −9.61                                    | −0.80                                    | 30.03                                     | −3.85                                                      |
| Mołdawa          | Bt1-2      | 146.5       | cls           | Sdp               | −14.90                                   | 1.23                                     | 32.13                                     | −1.76                                                      |
|                  | Bj2 (?)    | 274.1       | cls           | Sdp               | −8.15                                    | −0.97                                    | 29.86                                     | −4.03                                                      |
|                  | Bj2        | 304.5       | cls           | Sdp               | −3.67                                    | −2.28                                    | 28.51                                     | −5.38                                                      |
|                  | Aa1        | 451.5       | cls           | Sdp               | −3.93                                    | −3.30                                    | 27.46                                     | −6.43                                                      |
| Omęcín XI/2      | Bj2        | 36.0        | cls           | Sdp               | −8.92                                    | −8.87                                    | 21.71                                     | −12.17                                                     |
|                  |            | 44.7        | sst           | Sdp               | −4.34                                    | −0.42                                    | 30.42                                     | −3.46                                                      |
|                  |            | 57.8        | sst           | Sdp               | −6.03                                    | −1.13                                    | 29.69                                     | −4.19                                                      |
|                  | Bj1        | 110.2       | sst           | Sdp               | −9.66                                    | 1.55                                     | 32.46                                     | −1.43                                                      |
|                  | Aa1        | 176.0       | sst           | Sdp               | −12.19                                   | −0.42                                    | 30.43                                     | −3.46                                                      |
|                  |            | 179.0       | sst           | Sdp               | −10.06                                   | 0.09                                     | 30.95                                     | −2.93                                                      |
|                  | Bt1-2      | 105.4       | sst           | Sdp<br>Cal        | −15.33<br>−8.25                          | 1.10<br>−5.54                            | 32.00<br>25.15                            | −1.89<br>−                                                 |
| Omęcín XI/3      | Bj2        | 120.3       | sst           | Sdp               | −6.62                                    | 0.46                                     | 31.34                                     | −2.55                                                      |
|                  |            | 136.4       | sst           | Sdp               | −7.39                                    | −1.53                                    | 29.28                                     | −4.60                                                      |
|                  |            | 169.0       | cls           | Sdp               | −11.33                                   | −7.80                                    | 22.82                                     | −11.07                                                     |
|                  |            | 200.0       | cls           | Sdp               | −9.68                                    | 1.67                                     | 32.58                                     | −1.31                                                      |
|                  |            | 225.0       | cls           | Sdp               | −2.71                                    | 0.45                                     | 31.32                                     | −2.56                                                      |
|                  | Aa1 (?)    | 234.0       | cls           | Sdp               | −4.42                                    | 1.87                                     | 32.73                                     | −1.10                                                      |
|                  | Aa1-J1 (?) | 234.0       | cls           | Sdp               | −4.42                                    | 1.87                                     | 32.73                                     | −1.10                                                      |
| Wagłany k/Opczna | Bt1-2      | 361.2       | cls           | Sdp               | −8.29                                    | −2.53                                    | 28.26                                     | −5.64                                                      |
|                  |            | 395.2       | cls           | Sdp               | −17.68                                   | −3.86                                    | 26.88                                     | −7.01                                                      |
|                  | Bj2        | 455.0       | sst           | Sdp               | −11.87                                   | −6.23                                    | 24.43                                     | −9.45                                                      |
|                  |            | 501.6       | cls           | Sdp               | −3.92                                    | −3.82                                    | 26.92                                     | −6.97                                                      |
|                  | Aa1        | 600.2       | sst           | Sdp<br>Pt         | −8.63<br>−9.58                           | −7.84<br>−10.45                          | 22.78<br>20.08                            | −11.11<br>−                                                |
|                  |            | 643.8       | sst           | Sdp               | −10.83                                   | −8.82                                    | 21.77                                     | −                                                          |
|                  |            | 643.8       | sst           | Sdp               | −10.83                                   | −8.82                                    | 21.77                                     | −                                                          |
| Władysław        | Bt1-2      | 184.0       | sst           | Sdp               | −14.12                                   | −6.23                                    | 24.44                                     | −9.45                                                      |
|                  |            | 184.4       | cls           | Sdp               | −12.89                                   | 0.31                                     | 31.18                                     | −2.71                                                      |
|                  | Bt1-2 (?)  | 296.6       | cls           | Sdp               | −5.81                                    | −0.95                                    | 29.88                                     | −4.01                                                      |
|                  | Aa1        | 396.3       | cls           | Sdp               | −1.58                                    | 0.66                                     | 31.54                                     | −2.35                                                      |
| Wyszmontów 1     | Bt3-Cl     | 42.4        | sst           | Cal               | −5.80                                    | −7.33                                    | 23.30                                     | −                                                          |

|                     |         |           |     |     |        |       |       |       |
|---------------------|---------|-----------|-----|-----|--------|-------|-------|-------|
|                     | Bt1-2   | 61.65     | cls | Syd | −9.88  | 2.12  | 33.04 | −0.84 |
|                     |         | 77.5–77.6 | cls | Sdp | −4.67  | 1.63  | 32.54 | −1.35 |
|                     |         | 77.9      | cls | Sdp | −11.31 | 1.45  | 32.36 | −1.53 |
|                     |         | 84.5      | cls | Sdp | −12.72 | 1.83  | 32.74 | −1.14 |
|                     | Bj2     | 91.6      | sst | Sdp | −2.67  | 1.57  | 32.48 | −1.41 |
|                     |         | 91.7      | sst | Sdp | −3.28  | 1.76  | 32.67 | −1.21 |
|                     |         |           |     | Cal | −11.15 | −4.45 | 26.27 | –     |
|                     | Bj2     | 92.8      | cls | Syd | −0.63  | 2.30  | 33.23 | −0.66 |
|                     |         | 103.7     | sst | Sdp | −10.27 | −0.93 | 29.90 | −3.99 |
|                     |         | 126.3     | cls | Sdp | 1.51   | 1.65  | 32.56 | −1.33 |
|                     |         | 135.1     | cls | Sdp | −8.33  | −0.01 | 30.85 | −3.04 |
| Wyszmontów<br>PIG 2 | Bj2 (?) | 30.7      | cls | Sdp | −1.66  | −0.08 | 30.78 | −3.11 |
|                     |         | 31.8      | cls | Sd  | −5.98  | 0.89  | 31.78 | −2.11 |
|                     |         | 33.8      | cls | Sd  | −2.29  | −0.75 | 30.09 | −3.80 |
| Zalesie             | Bj2     | 206.2     | cls | Sdp | −0.62  | 1.48  | 32.39 | −1.50 |
| Antoniowskie        | Aa2     | 278.5     | sst | Sdp | −12.62 | −3.66 | 27.08 | −6.80 |

Legend as in table S1.
